# Supplementary material
Source: Springer Nature journal article supplement (https://www.springermedizin.de/resource/supplementary/12936_2010_1332_MOESM3_ESM.pdf/9549540)

**2004**

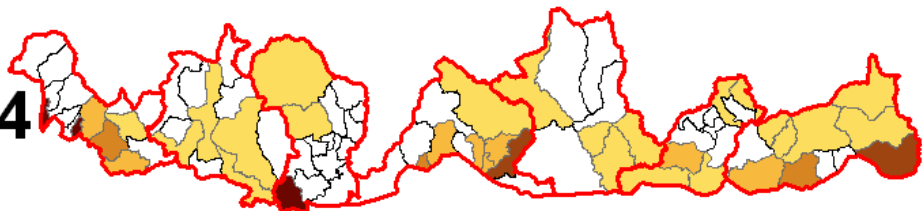

**2005**

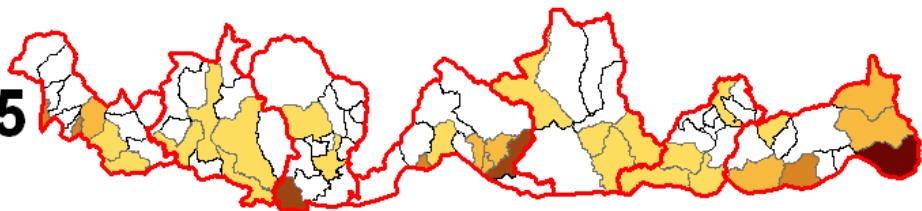

**2006**

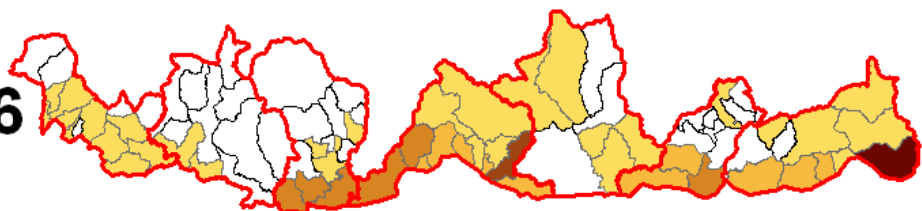

**2007**

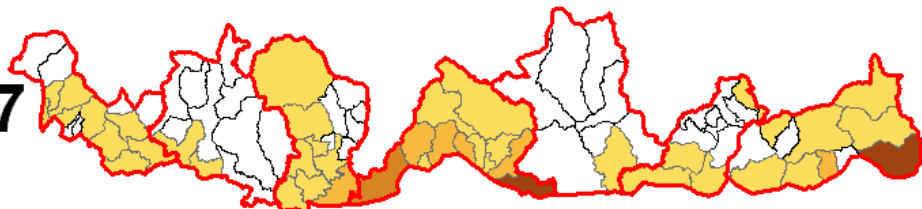

**2008**

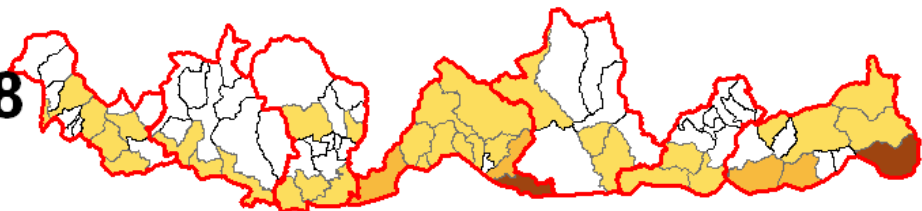

**Legend**

Malaria incidence rates per 10000 population

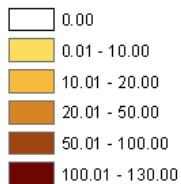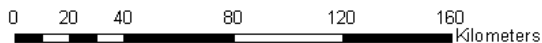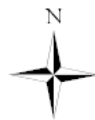

Supplement: MOESM3 [file 9549540]
